# Supplementary material for: The Feasibility of Ultra-Sensitive Phonocardiography in Acute Chest Pain Patients of a Tertiary Care Emergency Department (ScorED Feasibility Study)
Source: MDPI journal article supplement (doi:10.3390/jpm12040631), 2022-04-14
Supplement: s1 [file s1]

**Supplementary Table S1.** Overview of the measuring procedure. CAD = coronary artery disease. The procedure's time frame is fixed and given by the device/the manufacturer [19].

| Phase                        | Step                 | Time (seconds) | Action                             |
|------------------------------|----------------------|----------------|------------------------------------|
| Resting                      |                      | >300           | Patient lies on bed or stretcher   |
| Recording                    | Pre-recording        | 30 + 30        | Analyzing the recording conditions |
|                              | Breathing (#1)       | 18             | No recording                       |
|                              | Breathing pause (#1) | 8              | Recording                          |
|                              | Breathing (#2)       | 18             | No recording                       |
|                              | Breathing pause (#2) | 8              | Recording                          |
|                              | Breathing (#3)       | 18             | No recording                       |
|                              | Breathing pause (#3) | 8              | Recording                          |
|                              | Breathing (#4)       | 18             | No recording                       |
|                              | Breathing pause (#4) | 8              | Recording                          |
| Results                      | Post-recording       | 60–120         | Score calculation                  |
| Approx. total time (seconds) |                      | 524–564        |                                    |
