# Supplementary material for: The Feasibility of Ultra-Sensitive Phonocardiography in Acute Chest Pain Patients of a Tertiary Care Emergency Department (ScorED Feasibility Study)
Source: MDPI journal article supplement (doi:10.3390/jpm12040631), 2022-04-14
Supplement: s1 [file s1]

**Supplementary Table S2.** Results of the initial venous blood gas analysis and subsequent laboratory tests. Values are given for the total study cohort and subgroups concerning gender, known coronary artery disease (CAD), calculated CAD score, and final diagnosis regarding acute coronary syndrome (ACS). Categorical data are presented as counts and percentages, continuous data as medians and IQRs. Categorical data are analyzed using a test for linear association (Maentel–Haenszel chi-square test), continuous data using Kruskal–Wallis test for testing within the subgroups. CO<sub>2</sub> = carbon dioxide; HCO<sub>3</sub><sup>-</sup> = bicarbonate; Hct = haematocrit; MCV = mean corpuscular volume; MCHC = mean cell hemoglobin concentration; INR = international normalized ratio; APTT = activated partial thromboplastin time; BUN = blood urea nitrogen; ASAT = aspartate-aminotransferase; ALAT = alanine-aminotransferase; GGT = gamma-glutamyltransferase; LDH = lactic acid dehydrogenase; CK = creatine kinase; NT-proBNP = N-terminal pro brain natriuretic peptide; Hs-TnT = high-sensitive troponin-T; GFR = glomerular filtration rate; CRP = C-reactive protein; VWF = Van-Willebrand factor; ADAMTS13 = a disintegrin and metalloproteinase with a thrombospondin type 1 motif member 13; TSH = thyroid stimulating hormone; FT4 = free thyroxine; FT3 = free triiodothyronine; HDL = high-density lipoprotein; LHL = low-density lipoprotein; LP(a) = lipoprotein(a).

|                                        | Total<br><i>n</i> = 105 | Male<br><i>n</i> = 51 | Female<br><i>n</i> = 54 | No Known CAD<br><i>n</i> = 71 | Previously Known<br>CAD<br><i>n</i> = 34 | CAD score<br>> 20<br><i>n</i> = 59 | CAD score<br>≤ 20<br><i>n</i> = 25 | CAD score<br>Not Calculated<br><i>n</i> = 21 | No ACS as<br>Final<br>Diagnosis<br><i>n</i> = 102 | ACS as<br>Final<br>Diagnosis<br><i>n</i> = 3 |
|----------------------------------------|-------------------------|-----------------------|-------------------------|-------------------------------|------------------------------------------|------------------------------------|------------------------------------|----------------------------------------------|---------------------------------------------------|----------------------------------------------|
| <b>Initial venous BGA</b>              |                         |                       |                         |                               |                                          |                                    |                                    |                                              |                                                   |                                              |
| pH                                     | 7.38 (7.36–7.41)        | 7.38 (7.35–7.41)      | 7.39 (7.37–7.41)        | 7.39 (7.36–7.41)              | 7.37 (7.36–7.4)                          | 7.39 (7.36–7.41)                   | 7.38 (7.35–7.41)                   | 7.38 (7.37–7.42)                             | 7.39 (7.36–7.41)                                  | 7.40 (n.a.)                                  |
| pCO <sub>2</sub> , mmHg                | 43(39–48)               | 44 (40–49)            | 42 (38–47)              | 44 (40–49)                    | 41 (38–47)                               | 43 (40–48)                         | 41 (38–52)                         | 44 (40–47)                                   | 43 (39–48)                                        | 47 (n.a.)                                    |
| Lactate, mmol/L                        | 1.2 (1.0–1.6)           | 1.3 (1.1–1.8)         | 1.1 (0.9–1.5)           | 1.1 (0.8–1.4)                 | 1.5 (1.1–2)                              | 1.3 (1–1.5)                        | 1.0 (0.7–1.6)                      | 1.5 (1.13–2.4)                               | 1.2 (0.9–1.6)                                     | 1.4 (n.a.)                                   |
| HCO <sub>3</sub> <sup>-</sup> , mmol/L | 24 (23–25)              | 24 (23–25)            | 24 (23–25)              | 24 (23–25)                    | 23 (22–24)                               | 24 (23–25)                         | 24 (22–25)                         | 24 (23–25)                                   | 24 (23–25)                                        | 23 (n.a.)                                    |
| <b>Serum laboratory values</b>         |                         |                       |                         |                               |                                          |                                    |                                    |                                              |                                                   |                                              |
| Erythrocytes, G/L                      | 5 (4–5)                 | 5 (4–5)               | 4 (4–5)                 | 5 (4–5)                       | 5 (4–5)                                  | 5 (4–5)                            | 5 (4–5)                            | 5 (4–5)                                      | 5 (4–5)                                           | 4 (n.a.)                                     |
| Hemoglobin, g/dL                       | 13 (12–14)              | 14 (13–15)            | 13 (12–13)              | 13 (12–14)                    | 13 (12–15)                               | 13 (12–14)                         | 13 (12–14)                         | 14 (13–15)                                   | 13 (12–14)                                        | 13 (n.a.)                                    |
| Hct, %                                 | 40 (36–43)              | 41 (38–45)            | 39 (36–40)              | 40 (36–42)                    | 40 (36–44)                               | 39 (35–43)                         | 40 (36–41)                         | 41 (40–44)                                   | 40 (36–43)                                        | 40 (n.a.)                                    |
| MCV, fL                                | 89 (86–91)              | 89 (86–92)            | 88 (86–91)              | 88 (86–91)                    | 90 (87–92)                               | 89 (86–91)                         | 87 (85–91)                         | 90 (87–94)                                   | 89 (86–91)                                        | 89 (n.a.)                                    |
| MCH, pg                                | 30 (29–31)              | 30 (29–31)            | 29 (28–31)              | 30 (28–31)                    | 30 (29–31)                               | 30 (28–31)                         | 29 (28–30)                         | 30 (29–31)                                   | 30 (28–31)                                        | 30 (n.a.)                                    |
| MCHC, g/dL                             | 33 (32–34)              | 33 (33–34)            | 33 (32–34)              | 33 (33–34)                    | 33 (33–34)                               | 33 (33–34)                         | 33 (33–34)                         | 33 (32–34)                                   | 33 (33–34)                                        | 33 (n.a.)                                    |
| Platelet, G/L                          | 240 (196–284)           | 221 (187–263)         | 250 (216–295)           | 246 (205–282)                 | 222 (178–296)                            | 238 (194–273)                      | 248 (219–290)                      | 230 (161–314)                                | 240 (193–284)                                     | 258 (n.a.)                                   |
| Leucocyte, G/L                         | 8 (7–10)                | 9 (7–11)              | 8 (6–9)                 | 8 (6–9)                       | 8 (7–13)                                 | 8 (7–9)                            | 8 (6–9)                            | 10 (7–13)                                    | 8 (7–10)                                          | 10 (n.a.)                                    |
| Quick, %                               | 94 (78–104)             | 89 (77–101)           | 95 (80–109)             | 94 (79–106)                   | 92 (78–103)                              | 94 (77–101)                        | 94 (79–107)                        | 92 (83–118)                                  | 94 (78–10)                                        | 91 (n.a.)                                    |
| INR                                    | 1.0 (1.0–1.1)           | 1.1 (1.0–1.1)         | 1.0 (1.0–1.1)           | 1.0 (1.0–1.1)                 | 1.0 (1.0–1.1)                            | 1.0 (1.0–1.1)                      | 1.0 (1.0–1.1)                      | 1.0 (0.9–1.1)                                | 1 (1–1.1)                                         | 1.0 (n.a.)                                   |
| APTT, sec                              | 37 (34–3)               | 37 (34–39)            | 37 (34–40)              | 37 (35–40)                    | 37 (32–39)                               | 37 (35–39)                         | 36 (35–40)                         | 34 (33–39)                                   | 37 (34–39)                                        | 37 (n.a.)                                    |
| Fibrinogen, mg/dL                      | 353 (308–407)           | 352 (307–434)         | 358 (309–399)           | 335 (291–390)                 | 400 (348–470)                            | 361 (316–407)                      | 329 (279–347)                      | 400 (351–576)                                | 355 (309–407)                                     | 345 (n.a.)                                   |
| Sodium, mmol/L                         | 138 (137–140)           | 138 (137–139)         | 138 (137–140)           | 138 (137–140)                 | 137 (136–139)                            | 138 (136–140)                      | 139 (137–140)                      | 138 (136–140)                                | 138 (137–140)                                     | 138 (n.a.)                                   |
| Potassium, mmol/L                      | 4.1 (3.8–4.3)           | 4.1 (3.9–4.4)         | 3.9 (3.7–4.2)           | 3.9 (3.7–4.1)                 | 4.1 (4.0–4.5)                            | 4.1 (3.8–4.4)                      | 3.9 (3.7–4.0)                      | 3.9 (3.7–4.1)                                | 4.0 (3.8–4.3)                                     | 4.0 (n.a.)                                   |
| Chloride, mmol/L                       | 103 (100–105)           | 103 (101–104)         | 103 (99–105)            | 103 (101–105)                 | 103 (100–104)                            | 103 (100–104)                      | 104 (102–106)                      | 101 (99–103)                                 | 103 (100–105)                                     | 104 (n.a.)                                   |

|                                |               |               |               |               |                |                |               |               |                |            |
|--------------------------------|---------------|---------------|---------------|---------------|----------------|----------------|---------------|---------------|----------------|------------|
| Calcium, mmol/L                | 2.3 (2.2–2.4) | 2.3 (2.2–2.4) | 2.3 (2.3–2.4) | 2.3 (2.2–2.4) | 2.3 (2.2–2.4)  | 2.3 (2.2–2.4)  | 2.3 (2.2–2.4) | 2.3 (2.3–2.4) | 2.3 (2.2–2.4)  | 2.3 (n.a.) |
| Magnesium, mmol/L              | 0.9 (0.8–0.9) | 0.9 (0.9–1.0) | 0.8 (0.8–0.9) | 0.9 (0.8–0.9) | 0.9 (0.8–0.9)  | 0.9 (0.8–0.92) | 0.9 (0.8–0.9) | 0.9 (0.8–0.9) | 0.9 (0.8–0.9)  | 0.9 (n.a.) |
| Creatinine, mg/dL              | 0.9 (0.8–1.1) | 1.0 (0.9–1.2) | 0.8 (0.7–1.0) | 0.8 (0.7–1.0) | 1.0 (1.0–1.5)  | 1.0 (0.8–1.1)  | 0.7 (0.7–1.0) | 1.0 (0.7–1.5) | 0.9 (0.8–1.1)  | 1.0 (n.a.) |
| BUN, mg/dL                     | 15 (12–19)    | 16 (12–23)    | 14 (11–17)    | 14 (11–17)    | 18 (14–24)     | 16 (13–22)     | 12 (10–15)    | 14 (11–18)    | 15 (12–19)     | 18 (n.a.)  |
| Total protein, g/L             | 72 (68–75)    | 73 (67–76)    | 72 (68–75)    | 72 (69–75)    | 71 (66–75)     | 72 (67–75)     | 71 (65–75)    | 73 (72–78)    | 72 (67–75)     | 74 (n.a.)  |
| Albumine, g/L                  | 42 (39–45)    | 42 (39–45)    | 42 (39–45)    | 43 (41–45)    | 50 (38–44)     | 42 (39–45)     | 44 (39–45)    | 43 (39–46)    | 42 (39–45)     | 42 (n.a.)  |
| Cholinesterase, kU/L           | 7.6 (6.2–8.7) | 7.9 (6.3–8.8) | 7.5 (6.2–8.4) | 7.8 (6.2–9.0) | 7.1 (6.2–8.2)  | 7.6 (6.2–8.7)  | 7.3 (6.1–9.1) | 7.6 (6.4–8.3) | 7.5 (6.2–8.6)  | 8.0 (n.a.) |
| Alkaline phosphate, U/L        | 72 (62–92)    | 72 (63–94)    | 70 (61–92)    | 69 (61–89)    | 74 (66–94)     | 70 (62–89)     | 68 (53–89)    | 85 (69–104)   | 72 (63–92)     | 61 (n.a.)  |
| ASAT, U/L                      | 22 (19–27)    | 23 (19–32)    | 22 (19–25)    | 22 (19–27)    | 21 (16–29)     | 22 (18–27)     | 22 (20–27)    | 23 (19–31)    | 22 (19–28)     | 21 (n.a.)  |
| ALAT, U/L                      | 21 (17–32)    | 23 (17–41)    | 21 (17–26)    | 22 (18–31)    | 20 (15–36)     | 20 (16–30)     | 22 (18–35)    | 25 (21–34)    | 21 (17–33)     | 18 (n.a.)  |
| GGT, U/L                       | 27 (16–47)    | 38 (18–67)    | 20 (16–32)    | 24 (16–45)    | 36 (17–72)     | 31 (18–51)     | 16 (12–24)    | 41 (24–60)    | 27 (16–48)     | 29 (n.a.)  |
| LDH, U/L                       | 187 (163–218) | 183 (156–213) | 191 (175–220) | 187 (169–218) | 194 (158–220)  | 193 (160–221)  | 184 (167–216) | 181 (160–216) | 187 (164–218)  | 180 (n.a.) |
| CK, U/L                        | 92 (63–126)   | 97 (64–155)   | 89 (59–116)   | 95 (68–147)   | 70 (49–107)    | 93 (62–129)    | 94 (68–144)   | 88 (58–105)   | 93 (63–127)    | 84 (n.a.)  |
| CKMB, %                        | 16 (11–24)    | 16 (12–25)    | 15 (9–23)     | 15 (9–22)     | 24 (15–39)     | 15 (10–24)     | 22 (14–58)    | 14 (9–33)     | 16 (11–24)     | n.a.       |
| NT-proBNP, pg/mL               | 164 (74–470)  | 132 (53–478)  | 169 (86–469)  | 124 (48–207)  | 405 (141–3133) | 224 (113–569)  | 107 (41–170)  | 96 (73–595)   | 157 (73–475)   | 251 (n.a.) |
| Hs-TnT 1, ng/L                 | 8 (4–19)      | 9 (4–28)      | 5 (4–13)      | 4 (4–10)      | 14 (9–32)      | 10 (5–23)      | 4 (4–5)       | 9 (4–18)      | 8 (4–14)       | 26 (n.a.)  |
| Hs-TnT 2, ng/L                 | 11 (5–27)     | 19 (6–35)     | 10 (4–22)     | 9 (4–22)      | 23 (9–33)      | 14 (7–30)      | 5 (4–10)      | 9 (4–35)      | 10 (5–26)      | 52 (n.a.)  |
| Hs-TnT 3, ng/L                 | 29 (10–36)    | 36 (16–114)   | 18 (6–32)     | 24 (4–34)     | 34 (11–89)     | 24 (10–34)     | 140 (140–141) | n.a.          | 23 (9–63)      | 29 (n.a.)  |
| Glucose, mg/dL                 | 102 (92–118)  | 102 (92–118)  | 102 (91–119)  | 99 (89–110)   | 107 (99–125)   | 105 (93–120)   | 94 (88–105)   | 102 (95–132)  | 102 (92–118)   | 107 (n.a.) |
| GFR, mL/min/1.73m <sup>2</sup> | 41 (33–57)    | 47 (33–57)    | 35 (32–82)    | 56 (35–70)    | 35 (27–48)     | 43 (34–61)     | 49 (44–54)    | 35 (27–54)    | 38 (33–56)     | 58 (n.a.)  |
| CRP, mg/dL                     | 0.3 (0.1–0.6) | 0.3 (0.1–0.9) | 0.3 (0.1–0.5) | 0.2 (0.1–0.4) | 0.6 (0.1–2.1)  | 0.3 (0.1–0.6)  | 0.2 (0.1–0.4) | 0.6 (0.2–1.2) | 0.3 (0.1–0.7)  | 0.4 (n.a.) |
| VWF antigen, %                 | 152 (109–225) | 153 (115–219) | 144 (106–228) | 135 (106–202) | 208 (117–247)  | 149 (103–224)  | 133 (100–161) | 208 (155–273) | 151 (108–226)  | 218 (n.a.) |
| VWF activity, %                | 145 (111–200) | 144 (110–178) | 146 (110–204) | 135 (105–174) | 174 (118–235)  | 134 (106–202)  | 133 (90–167)  | 178 (149–213) | 144 (110–197)  | 201 (n.a.) |
| VW-Ristocetin, %               | 137 (104–206) | 136 (105–193) | 141 (99–211)  | 134 (100–163) | 171 (105–229)  | 137 (101–185)  | 128 (65–151)  | 175 (135–231) | 136 (104–193)  | 220 (n.a.) |
| ADAMTS13 activity, %           | 86 (79–99)    | 86 (80–96)    | 86 (78–102)   | 86 (79–98)    | 86 (79–106)    | 86 (80–98)     | 88 (84–99)    | 84 (74–110)   | 86 (79–97)     | 106 (n.a.) |
| TSH, $\mu$ IU/mL               | 1.2 (0.9–1.9) | 1.2 (0.9–2.0) | 1.3 (0.8–1.8) | 1.3 (0.8–1.9) | 1.2 (0.9–2.5)  | 1.3 (0.9–2.0)  | 1.2 (1.0–1.7) | 1.1 (0.6–2.5) | 1.3 (0.9–1.9)  | 1.0 (n.a.) |
| FT4, ng/dL                     | 1.2 (1.1–1.5) | 1.2 (1.1–1.5) | 1.3 (1.1–1.5) | 1.2 (1.1–1.5) | 1.3 (1.1–1.5)  | 1.3 (1.1–1.5)  | 1.2 (1.0–1.3) | 1.4 (1.1–1.5) | 1.3 (1.1–1.5)  | 1.2 (n.a.) |
| FT3, pg/mL                     | 2.9 (2.7–3.2) | 3.0 (2.9–3.3) | 2.8 (2.6–3.0) | 2.9 (2.7–3.2) | 2.9 (2.6–3.2)  | 2.9 (2.7–3.2)  | 2.8 (2.7–3.1) | 3.0 (2.6–3.3) | 3.0 (2.67–3.2) | 3.2 (n.a.) |
| Phosphate, mmol/L              | 1.1 (0.9–1.3) | 1.1 (0.9–1.3) | 1.1 (1.0–1.3) | 1.1 (1.0–1.3) | 1.1 (0.9–1.3)  | 1.1 (1.0–1.3)  | 1.2 (1.0–1.2) | 1.1 (0.9–1.3) | 1.1 (1–1.3)    | 1 (n.a.)   |
| Iron, $\mu$ g/dL               | 66 (42–93)    | 70 (41–98)    | 65 (45–84)    | 66 (52–93)    | 57 (32–88)     | 66 (40–91)     | 66 (59–113)   | 60 (39–82)    | 66 (41–93)     | 66 (n.a.)  |
| Transferrin, mg/dL             | 239 (215–268) | 232 (214–264) | 244 (217–272) | 239 (215–261) | 239 (214–270)  | 233 (214–268)  | 244 (229–267) | 239 (205–279) | 239 (215–268)  | 231 (n.a.) |
| Transferrin saturation, %      | 19 (14–27)    | 21 (14–30)    | 18 (14–24)    | 20 (15–29)    | 16 (10–26)     | 19 (14–27)     | 20 (16–31)    | 17 (12–23)    | 19 (14–27)     | 20 (n.a.)  |
| Ferritin, $\mu$ g/L            | 133 (60–237)  | 181 (84–277)  | 102 (48–180)  | 113 (523–237) | 159 (81–238)   | 136 (76–212)   | 72 (45–191)   | 218 (53–283)  | 132 (60–237)   | 152 (n.a.) |
| Triglycerides, mg/dL           | 117 (72–176)  | 120 (69–170)  | 105 (68–198)  | 109 (65–184)  | 123 (78–165)   | 126 (65–179)   | 72 (64–141)   | 109 (95–170)  | 114 (70–172)   | 176 (n.a.) |
| Cholesterol, mg/dL             | 166 (123–202) | 158 (119–192) | 186 (150–223) | 188 (158–214) | 140 (103–163)  | 165 (115–203)  | 158 (125–188) | 184 (157–190) | 173 (123–202)  | 165 (n.a.) |
| HDL-cholesterol, mg/dL         | 47 (39–65)    | 45 (34–61)    | 57 (47–69)    | 52 (45–73)    | 40 (30–60)     | 45 (36–65)     | 59 (42–74)    | 48 (41–52)    | 48 (40–66)     | 29 (n.a.)  |
| Cholesterol/HDL quotient       | 3.6 (2.5–4.6) | 3.4 (2.6–4.7) | 3.5 (2.0–4.7) | 3.5 (2.5–4.6) | 3.4 (2.3–4.5)  | 3.4 (2.1–5.4)  | 2.6 (2.0–4.1) | 3.5 (3.4–4.6) | 3.5 (2.4–4.6)  | 6 (n.a.)   |
| LDL-cholesterol, mg/dL         | 92 (53–120)   | 80 (52–118)   | 106 (62–131)  | 113 (68–123)  | 66 (40–99)     | 92 (42–119)    | 68 (53–112)   | 120 (77–123)  | 90 (52–121)    | 101 (n.a.) |
| LP(a), nmol/L                  | 28 (12–156)   | 56 (12–159)   | 22 (7–154)    | 23 (8–124)    | 101 (16–193)   | 42 (14–131)    | 16 (9–193)    | 74 (8–192)    | 27 (11–148)    | 159 (n.a.) |
